# Supplementary material for: Evaluation of Metarhizium brunneum- and Metarhizium-Derived VOCs as Dual-Active Biostimulants and Pest Repellents in a Wireworm-Infested Potato Field
Source: MDPI journal article supplement (doi:10.3390/jof9060599), 2023-05-23
Supplement: s1 [file s1]

**Table S1.** Mean potato mass (g) for each potato recovered from included treatments. Total harvested potatoes weighed and averaged according to total tuber number.

|                     | Mean   | SE    | Lwr 95% ci | Upr 95% ci |
|---------------------|--------|-------|------------|------------|
| Control             | 61.06  | 5.852 | 50.6       | 73.683     |
| <i>Trichoderma</i>  | 83.368 | 7.934 | 69.177     | 100.47     |
| 1-octen-3-ol        | 69.785 | 6.691 | 57.825     | 84.218     |
| 3-octanone          | 62.912 | 6.039 | 52.119     | 75.941     |
| V275                | 78.722 | 7.442 | 65.402     | 94.754     |
| V275 + 1-octen-3-ol | 75.575 | 7.246 | 62.624     | 91.205     |
| V275 + 3-octanone   | 76.135 | 7.29  | 63.103     | 91.857     |

**Table S2.** Total potato count tuber for each treatment. Total number of harvested potatoes were weighed individually in pooled per block (divide treatment means by 26 for per plant means).

|                     | Mean    | SE     | Lwr 95% ci | Upr 95% ci |
|---------------------|---------|--------|------------|------------|
| Control             | 225.428 | 21.783 | 177.959    | 285.559    |
| <i>Trichoderma</i>  | 241.535 | 22.471 | 192.36     | 303.28     |
| 1-octen-3-ol        | 214.988 | 21.167 | 168.961    | 273.552    |
| 3-octanone          | 211.078 | 20.963 | 165.541    | 269.141    |
| V275                | 268.523 | 23.681 | 216.404    | 333.195    |
| V275 + 1-octen-3-ol | 215.064 | 21.169 | 169.031    | 273.634    |
| V275 + 3-octanone   | 221.884 | 21.58  | 174.893    | 281.5      |

**Table S3.** Total potato yield (mass; g) for each treatment. Total number of harvested potatoes were weighed individually in pooled per block (divide treatment means by 26 for per plant means)..

|                     | Mean      | SE       | Lwr 95% ci | Upr 95% ci |
|---------------------|-----------|----------|------------|------------|
| Control             | 15201.168 | 2338.151 | 10433.306  | 22147.87   |
| <i>Trichoderma</i>  | 20031.427 | 3081.111 | 13748.551  | 29185.48   |
| 1-octen-3-ol        | 14942.42  | 2298.353 | 10225.713  | 21770.884  |
| 3-octanone          | 13268.442 | 2040.871 | 9106.78    | 19331.92   |
| V275                | 21148.535 | 3252.938 | 14515.276  | 30813.092  |
| V275 + 1-octen-3-ol | 16120.521 | 2479.561 | 11064.302  | 23487.354  |
| V275 + 3-octanone   | 16997.661 | 2614.476 | 11666.329  | 24765.331  |
